# Supplementary material for: Adult Chironomid (Chironomidae: Diptera) Positive Phototactic Behaviour—A Cue for Adult Population Management and Impact on Insect Biodiversity at Lake Trasimeno, Central Italy
Source: MDPI journal article supplement (doi:10.3390/environments11010001), 2023-12-19
Supplement: s1 [file s1]

## Supplementary Material

**Table S1.** List of the identified taxa of Lepidoptera and their abundances in the Sant’Arcangelo (SA) samples collected in 2019 and 2020.

| Family        | Taxon                                        | 2019            |                 |                 |                 |                 |                 |                 |                 |                 |                  |                  | 2020            |                 |                 |                 |                 |                 |                 |                 |                 |                  |    | Total |    |    |   |    |    |     |    |    |     |    |    |    |   |  |  |    |  |  |  |  |    |   |
|---------------|----------------------------------------------|-----------------|-----------------|-----------------|-----------------|-----------------|-----------------|-----------------|-----------------|-----------------|------------------|------------------|-----------------|-----------------|-----------------|-----------------|-----------------|-----------------|-----------------|-----------------|-----------------|------------------|----|-------|----|----|---|----|----|-----|----|----|-----|----|----|----|---|--|--|----|--|--|--|--|----|---|
|               |                                              | SA <sub>1</sub> | SA <sub>2</sub> | SA <sub>3</sub> | SA <sub>4</sub> | SA <sub>5</sub> | SA <sub>6</sub> | SA <sub>7</sub> | SA <sub>8</sub> | SA <sub>9</sub> | SA <sub>10</sub> | SA <sub>11</sub> | SA <sub>1</sub> | SA <sub>2</sub> | SA <sub>3</sub> | SA <sub>4</sub> | SA <sub>5</sub> | SA <sub>6</sub> | SA <sub>7</sub> | SA <sub>8</sub> | SA <sub>9</sub> | SA <sub>10</sub> |    |       |    |    |   |    |    |     |    |    |     |    |    |    |   |  |  |    |  |  |  |  |    |   |
| Cossidae      | <i>Phragmataecia castaneae</i>               | 1               |                 |                 |                 |                 | 2               |                 |                 |                 |                  |                  | 1               |                 | 1               |                 |                 |                 |                 |                 |                 |                  |    | 5     |    |    |   |    |    |     |    |    |     |    |    |    |   |  |  |    |  |  |  |  |    |   |
| Cossidae      | <i>Zeuzera pyrina</i>                        |                 |                 |                 |                 |                 |                 |                 |                 |                 |                  |                  | 1               |                 |                 |                 |                 | 1               |                 |                 |                 |                  |    | 2     |    |    |   |    |    |     |    |    |     |    |    |    |   |  |  |    |  |  |  |  |    |   |
| Crambidae     | <i>Cydalima perspectalis</i>                 |                 |                 |                 |                 |                 |                 |                 |                 |                 |                  |                  | 1               |                 |                 |                 |                 |                 |                 |                 |                 |                  |    | 1     |    |    |   |    |    |     |    |    |     |    |    |    |   |  |  |    |  |  |  |  |    |   |
| Drepanidae    | <i>Thyatira batis</i>                        |                 |                 |                 |                 |                 |                 |                 |                 |                 |                  |                  | 2               |                 |                 |                 |                 |                 |                 |                 |                 |                  |    | 2     |    |    |   |    |    |     |    |    |     |    |    |    |   |  |  |    |  |  |  |  |    |   |
| Erebidae      | <sup>1</sup> <i>Euplagia quadripunctaria</i> |                 |                 |                 |                 |                 |                 |                 |                 |                 |                  |                  |                 |                 |                 |                 |                 |                 |                 |                 |                 |                  |    | 2     | 2  |    |   |    |    |     |    |    |     |    |    |    |   |  |  |    |  |  |  |  |    |   |
| Erebidae      | <i>Arctia villica</i>                        |                 |                 |                 |                 |                 | 5               |                 | 3               |                 | 1                |                  |                 |                 | 2               |                 | 6               |                 |                 |                 |                 |                  |    |       |    | 17 |   |    |    |     |    |    |     |    |    |    |   |  |  |    |  |  |  |  |    |   |
| Erebidae      | <i>Catocala</i> sp.                          |                 |                 |                 |                 |                 |                 |                 |                 |                 |                  |                  |                 |                 |                 |                 |                 |                 |                 |                 |                 |                  |    |       |    | 2  |   | 2  |    |     |    |    |     |    |    |    |   |  |  |    |  |  |  |  |    |   |
| Erebidae      | <i>Cymbalophora pudica</i>                   |                 |                 |                 |                 |                 |                 |                 |                 |                 |                  |                  |                 |                 |                 |                 |                 | 3               |                 | 5               |                 |                  |    |       |    | 4  | 6 | 18 |    |     |    |    |     |    |    |    |   |  |  |    |  |  |  |  |    |   |
| Erebidae      | <i>Diacrisia sannio</i>                      |                 |                 |                 |                 |                 |                 |                 |                 |                 |                  |                  | 5               |                 | 3               |                 | 2               |                 | 7               |                 |                 |                  |    |       |    |    |   | 3  | 20 |     |    |    |     |    |    |    |   |  |  |    |  |  |  |  |    |   |
| Erebidae      | <i>Dysauxes famula</i>                       |                 |                 |                 |                 |                 |                 |                 |                 |                 |                  |                  | 10              |                 | 12              |                 | 19              |                 |                 |                 | 10              |                  | 11 |       | 19 |    | 2 |    | 7  |     | 47 | 10 | 147 |    |    |    |   |  |  |    |  |  |  |  |    |   |
| Erebidae      | <i>Phragmatobia fuliginosa</i>               | 5               |                 | 1               |                 | 1               |                 | 3               |                 | 2               |                  | 3                |                 | 5               |                 | 4               |                 | 5               |                 | 3               |                 | 3                |    | 1     |    | 6  |   | 3  |    | 4   |    | 11 | 2   | 62 |    |    |   |  |  |    |  |  |  |  |    |   |
| Erebidae      | <i>Rhyparia purpurata</i>                    |                 |                 |                 |                 |                 |                 |                 |                 |                 |                  |                  |                 |                 |                 |                 |                 |                 |                 |                 |                 |                  |    | 1     |    |    |   |    |    |     |    |    | 1   |    |    |    |   |  |  |    |  |  |  |  |    |   |
| Erebidae      | <i>Spilosoma luteum</i>                      |                 |                 |                 |                 |                 |                 |                 |                 |                 |                  |                  | 3               |                 | 4               |                 |                 |                 | 7               |                 | 12              |                  | 2  |       |    |    |   |    |    |     |    | 28 |     |    |    |    |   |  |  |    |  |  |  |  |    |   |
| Geometridae   | <i>Rhodometra sacraria</i>                   |                 |                 |                 |                 |                 |                 |                 |                 |                 |                  |                  | 11              |                 | 1               |                 | 16              |                 |                 |                 |                 |                  |    |       |    |    |   |    |    | 1   | 9  | 10 | 48  |    |    |    |   |  |  |    |  |  |  |  |    |   |
| Lasiocampidae | <i>Lasiocampa trifolii</i>                   |                 |                 |                 |                 |                 |                 |                 |                 |                 |                  |                  | 3               |                 |                 |                 |                 |                 |                 |                 |                 |                  |    |       |    |    |   |    | 3  |     |    |    |     |    |    |    |   |  |  |    |  |  |  |  |    |   |
| Lasiocampidae | <i>Phyllodesma</i> sp.                       | 2               |                 | 3               |                 | 1               |                 |                 |                 |                 |                  |                  |                 |                 |                 |                 |                 |                 |                 |                 |                 | 2                | 1  |       | 1  |    |   |    |    |     |    |    |     | 10 |    |    |   |  |  |    |  |  |  |  |    |   |
| Lasiocampidae | <i>Poecilocampa alpina</i>                   | 1               |                 |                 |                 |                 |                 |                 |                 |                 |                  |                  |                 |                 |                 |                 |                 |                 |                 |                 |                 |                  |    |       |    |    |   |    |    |     |    |    |     |    | 1  |    |   |  |  |    |  |  |  |  |    |   |
| Noctuidae     | <i>Gripesia aprilina</i>                     | 1               |                 |                 |                 |                 |                 |                 |                 |                 |                  |                  |                 |                 |                 |                 |                 |                 |                 |                 |                 |                  |    |       |    |    |   |    |    |     |    |    |     |    | 1  |    |   |  |  |    |  |  |  |  |    |   |
| Noctuidae     | <i>Tyta luctuosa</i>                         |                 |                 |                 |                 |                 |                 |                 |                 |                 |                  |                  | 2               |                 | 1               |                 | 3               |                 | 1               |                 | 3               |                  |    |       | 2  |    | 1 |    |    |     |    |    |     |    |    | 13 |   |  |  |    |  |  |  |  |    |   |
| Notodontidae  | <i>Phalera bucephala</i>                     |                 |                 |                 |                 |                 |                 |                 |                 |                 |                  |                  | 1               |                 | 2               |                 | 2               |                 |                 |                 |                 |                  |    |       |    |    |   |    |    | 1   |    | 4  |     | 1  |    | 2  |   |  |  |    |  |  |  |  | 13 |   |
| Notodontidae  | <i>Spatalia argentina</i>                    |                 |                 |                 |                 |                 |                 |                 |                 |                 |                  |                  |                 |                 |                 |                 |                 |                 |                 |                 |                 |                  |    |       |    |    |   |    |    |     |    |    |     |    |    |    | 1 |  |  |    |  |  |  |  |    | 1 |
| Notodontidae  | <i>Thaumetopoea pityocampa</i>               |                 |                 |                 |                 |                 |                 |                 |                 |                 |                  |                  | 3               |                 |                 |                 |                 |                 |                 |                 |                 |                  |    |       |    |    |   |    |    |     |    |    |     |    |    |    |   |  |  | 3  |  |  |  |  |    |   |
| Saturniidae   | <i>Saturnia pyri</i>                         | 1               |                 |                 |                 |                 |                 |                 |                 |                 |                  |                  |                 |                 |                 |                 |                 |                 |                 |                 |                 |                  |    |       |    |    |   |    |    |     |    |    |     |    | 1  |    |   |  |  |    |  |  |  |  |    |   |
| Sphingidae    | <sup>1</sup> <i>Proserpinus proserpina</i>   |                 |                 |                 |                 |                 |                 |                 |                 |                 |                  |                  | 1               |                 |                 |                 |                 | 3               |                 | 1               |                 | 1                |    |       |    |    |   |    |    |     |    |    |     |    |    | 6  |   |  |  |    |  |  |  |  |    |   |
| Sphingidae    | <i>Deilephila elpenor</i>                    |                 |                 |                 |                 |                 | 1               |                 | 1               |                 | 1                |                  |                 |                 | 7               |                 |                 |                 |                 |                 |                 |                  |    |       |    |    |   |    | 10 |     |    |    |     |    |    |    |   |  |  |    |  |  |  |  |    |   |
| Sphingidae    | <i>Deilephila porcellus</i>                  | 3               |                 | 7               |                 | 2               |                 | 2               |                 |                 |                  |                  |                 |                 |                 |                 |                 |                 |                 |                 | 2               |                  | 11 |       | 1  |    | 2 |    | 1  |     | 2  |    |     |    |    |    |   |  |  | 33 |  |  |  |  |    |   |
| Sphingidae    | <i>Laotloe populi</i>                        | 1               |                 |                 |                 |                 | 2               |                 | 1               |                 | 2                |                  | 1               |                 | 1               |                 | 1               |                 | 3               |                 | 2               |                  | 2  |       | 2  |    | 4 |    |    |     |    |    |     |    |    | 22 |   |  |  |    |  |  |  |  |    |   |
| Sphingidae    | <i>Marumba quercus</i>                       |                 |                 |                 |                 |                 |                 |                 |                 |                 |                  |                  | 1               |                 |                 |                 |                 | 2               |                 | 1               |                 | 2                |    | 1     |    |    |   |    |    |     |    |    | 7   |    |    |    |   |  |  |    |  |  |  |  |    |   |
| Sphingidae    | <i>Mimas tiliae</i>                          | 1               |                 | 2               |                 | 2               |                 | 2               |                 | 2               |                  |                  |                 |                 |                 | 6               |                 | 3               |                 | 1               |                 | 3                |    | 1     |    | 1  |   |    |    |     |    |    |     |    | 24 |    |   |  |  |    |  |  |  |  |    |   |
| Sphingidae    | <i>Smerinthus ocellata</i>                   |                 |                 |                 |                 |                 |                 |                 |                 |                 |                  |                  | 1               |                 |                 |                 |                 | 1               |                 |                 |                 |                  |    |       |    |    | 2 |    |    |     |    |    |     |    |    | 6  |   |  |  |    |  |  |  |  |    |   |
| Sphingidae    | <i>Sphinx ligustri</i>                       |                 |                 |                 |                 |                 |                 |                 |                 |                 |                  |                  |                 |                 |                 |                 |                 |                 |                 |                 |                 |                  |    | 1     |    |    |   |    |    |     |    |    |     |    | 1  |    |   |  |  |    |  |  |  |  |    |   |
|               | Total                                        | 2               | 8               | 11              | 19              | 10              | 15              | 7               | 9               | 36              | 32               | 45               | 20              | 35              | 53              | 18              | 33              | 17              | 7               | 30              | 83              | 20               |    |       |    |    |   |    |    | 510 |    |    |     |    |    |    |   |  |  |    |  |  |  |  |    |   |

<sup>1</sup> Species included in the annexes of the “Habitat” Directive (92/43/EC)

**Table S2.** List of the insect species included in the annexes of the “Habitat” Directive (92/43/EC) and their abundance in the Sant’Arcangelo (SA) samples collected in 2019 and 2020.

| Order       | Family     | Species                         | 2019            |                 |                 |                 |                 |                 |                 |                 |                 |                  |                  | 2020            |                 |                 |                 |                 |                 |                 |                 |                 |                  |    | Total |
|-------------|------------|---------------------------------|-----------------|-----------------|-----------------|-----------------|-----------------|-----------------|-----------------|-----------------|-----------------|------------------|------------------|-----------------|-----------------|-----------------|-----------------|-----------------|-----------------|-----------------|-----------------|-----------------|------------------|----|-------|
|             |            |                                 | SA <sub>1</sub> | SA <sub>2</sub> | SA <sub>3</sub> | SA <sub>4</sub> | SA <sub>5</sub> | SA <sub>6</sub> | SA <sub>7</sub> | SA <sub>8</sub> | SA <sub>9</sub> | SA <sub>10</sub> | SA <sub>11</sub> | SA <sub>1</sub> | SA <sub>2</sub> | SA <sub>3</sub> | SA <sub>4</sub> | SA <sub>5</sub> | SA <sub>6</sub> | SA <sub>7</sub> | SA <sub>8</sub> | SA <sub>9</sub> | SA <sub>10</sub> |    |       |
| Lepidoptera | Erebidae   | <i>Euplagia quadripunctaria</i> |                 |                 |                 |                 |                 |                 |                 |                 |                 |                  |                  |                 |                 |                 |                 |                 |                 |                 |                 |                 | 2                | 2  |       |
| Lepidoptera | Sphingidae | <i>Proserpinus proserpina</i>   |                 |                 |                 | 1               |                 |                 |                 |                 |                 |                  |                  | 3               | 1               |                 |                 | 1               |                 |                 |                 |                 |                  | 6  |       |
| Odonata     | Gomphidae  | <i>Lindenia tetraphylla</i>     |                 |                 |                 |                 |                 | 9               |                 |                 |                 |                  |                  |                 |                 |                 | 3               | 5               | 4               |                 |                 |                 |                  | 21 |       |
| Coleoptera  | Lucanidae  | <i>Lucanus cervus</i>           |                 |                 |                 |                 |                 | 2               |                 |                 |                 |                  |                  |                 |                 |                 |                 |                 |                 |                 |                 |                 |                  | 2  |       |

**Table S3.** Abundance of the alien invasive species *Halyomorpha halys* in the Sant’Arcangelo (SA) samples collected in 2019 and 2020.

| Order     | Family       | Species                  | 2019            |                 |                 |                 |                 |                 |                 |                 |                 |                  |                  | 2020            |                 |                 |                 |                 |                 |                 |                 |                 |                  |    | Total |
|-----------|--------------|--------------------------|-----------------|-----------------|-----------------|-----------------|-----------------|-----------------|-----------------|-----------------|-----------------|------------------|------------------|-----------------|-----------------|-----------------|-----------------|-----------------|-----------------|-----------------|-----------------|-----------------|------------------|----|-------|
|           |              |                          | SA <sub>1</sub> | SA <sub>2</sub> | SA <sub>3</sub> | SA <sub>4</sub> | SA <sub>5</sub> | SA <sub>6</sub> | SA <sub>7</sub> | SA <sub>8</sub> | SA <sub>9</sub> | SA <sub>10</sub> | SA <sub>11</sub> | SA <sub>1</sub> | SA <sub>2</sub> | SA <sub>3</sub> | SA <sub>4</sub> | SA <sub>5</sub> | SA <sub>6</sub> | SA <sub>7</sub> | SA <sub>8</sub> | SA <sub>9</sub> | SA <sub>10</sub> |    |       |
| Hemiptera | Pentatomidae | <i>Halvomorpha halvs</i> |                 |                 |                 |                 |                 | 1               | 2               |                 |                 |                  |                  |                 |                 |                 |                 |                 |                 | 2               | 12              | 4               | 1                | 22 |       |

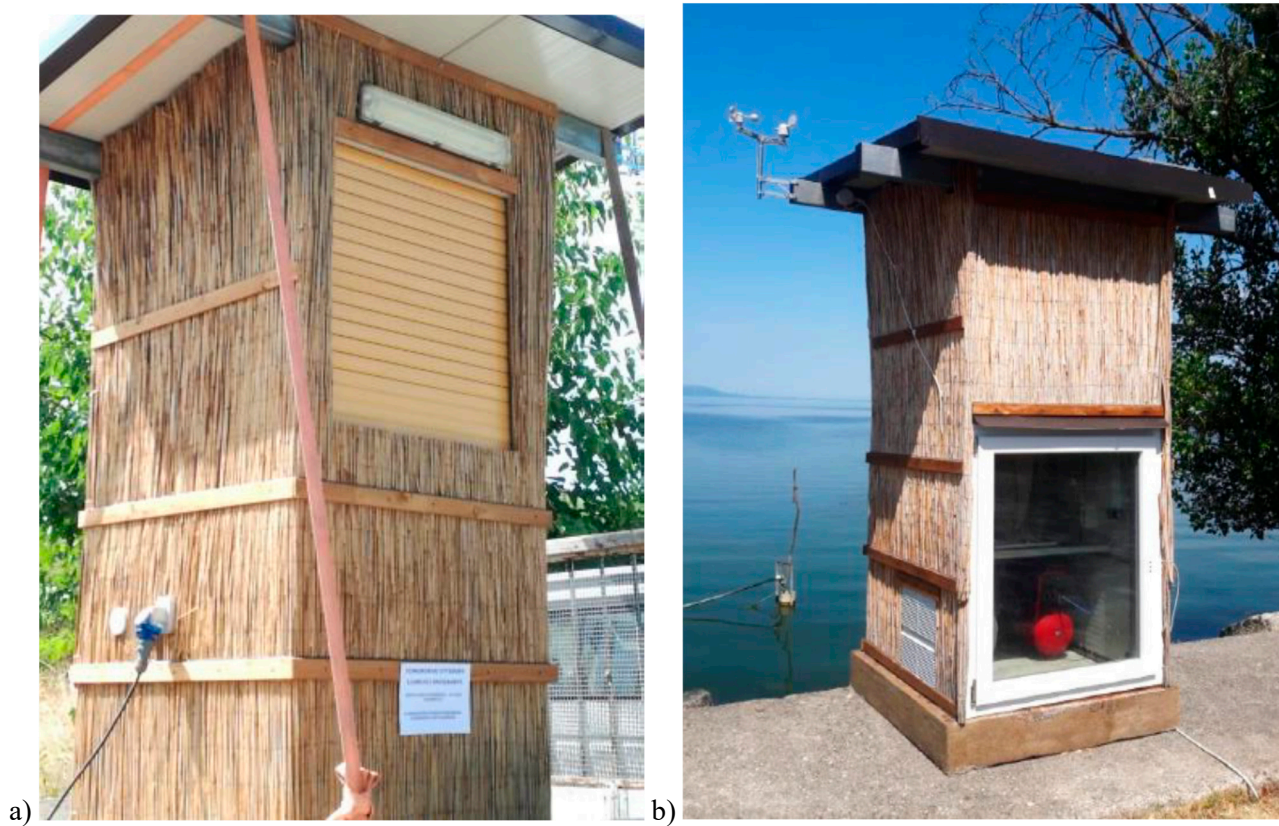

**Figure S1.** ChiroTrap: a) front side; b) back side.

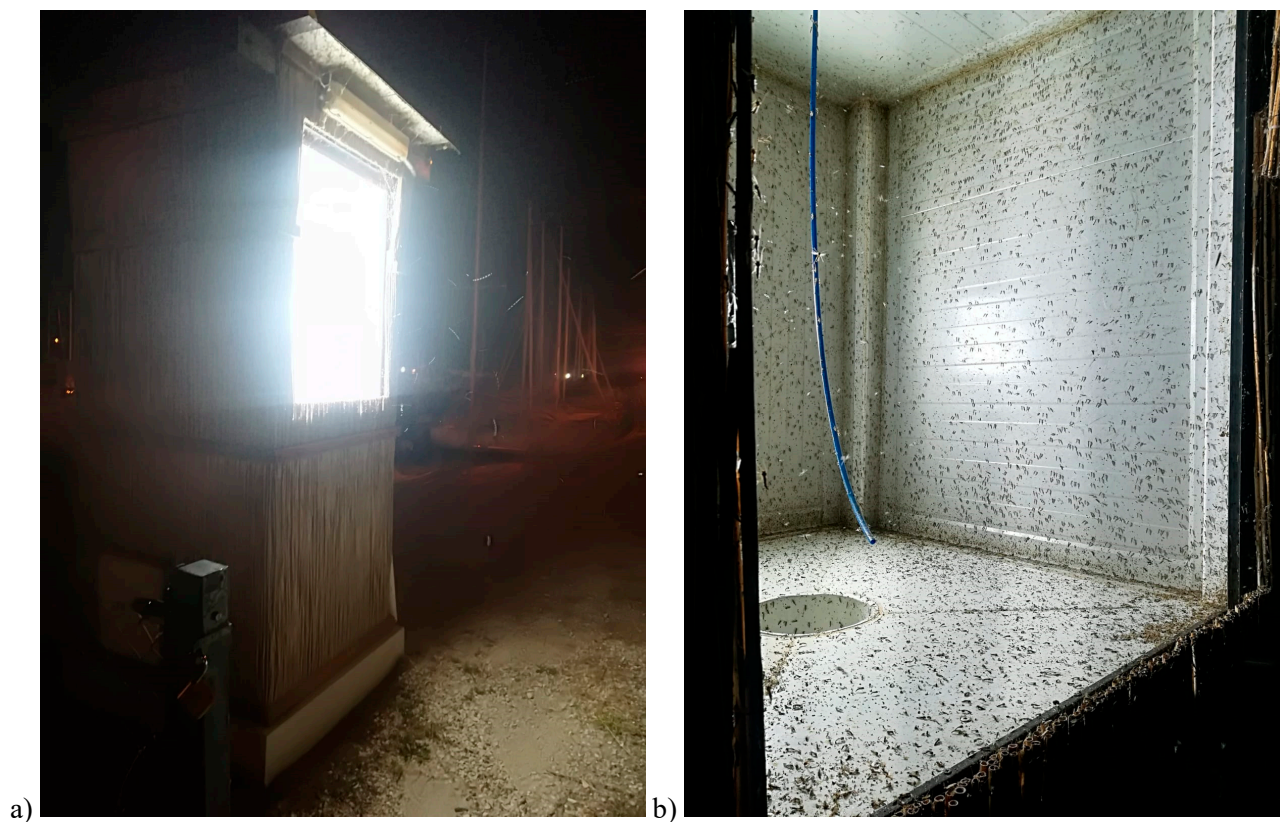

**Figure S2.** a) ChiroTrap in operation; b) internal attraction and aspiration chamber of the ChiroTrap.

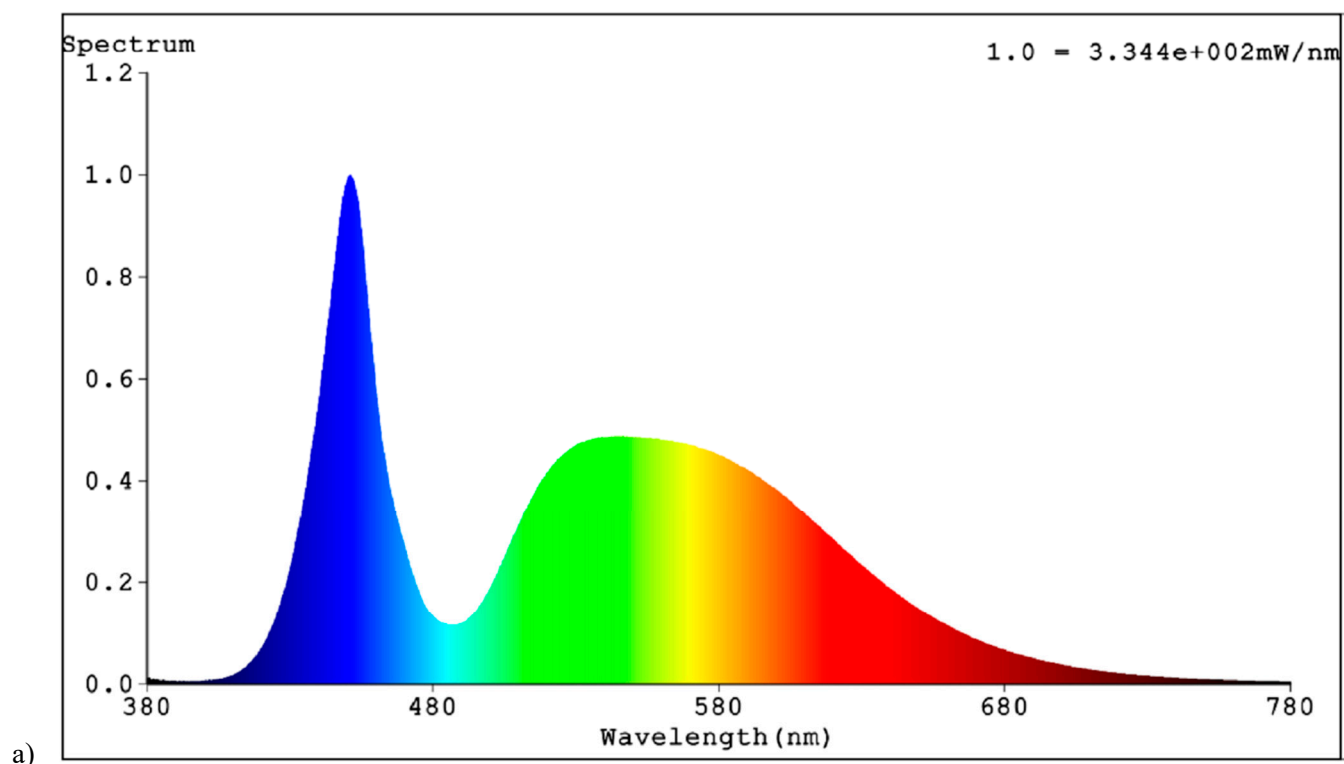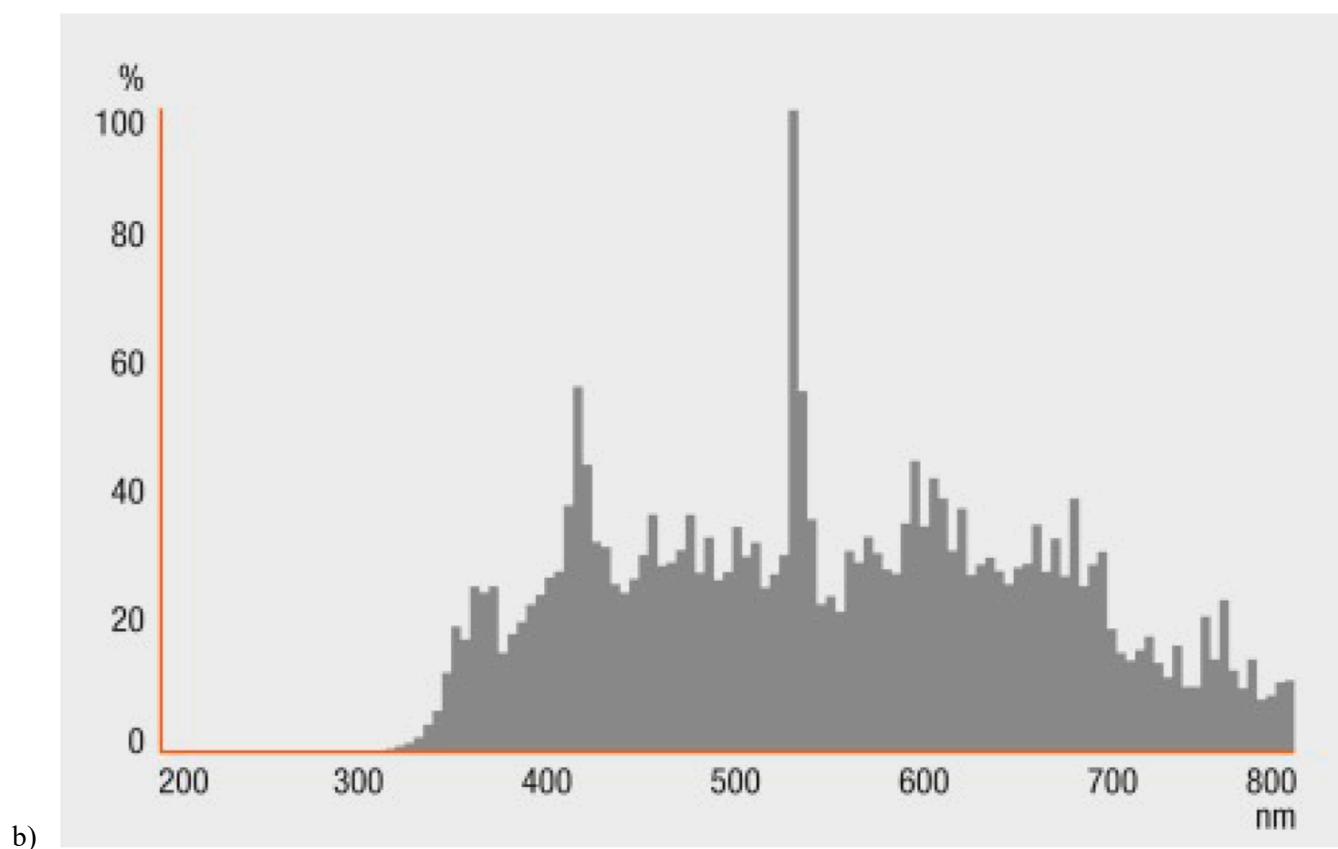

**Figure S3.** Emission spectra of a) LED lamp (V-TAC, 100 W, 6,000 K) used in the ChiroTrap located at Passignano sul Trasimeno (PA), and b) gas discharge lamp (Osram, 250 W, 5,200 K) used in the ChiroTrap located at Sant’Arcangelo (SA).



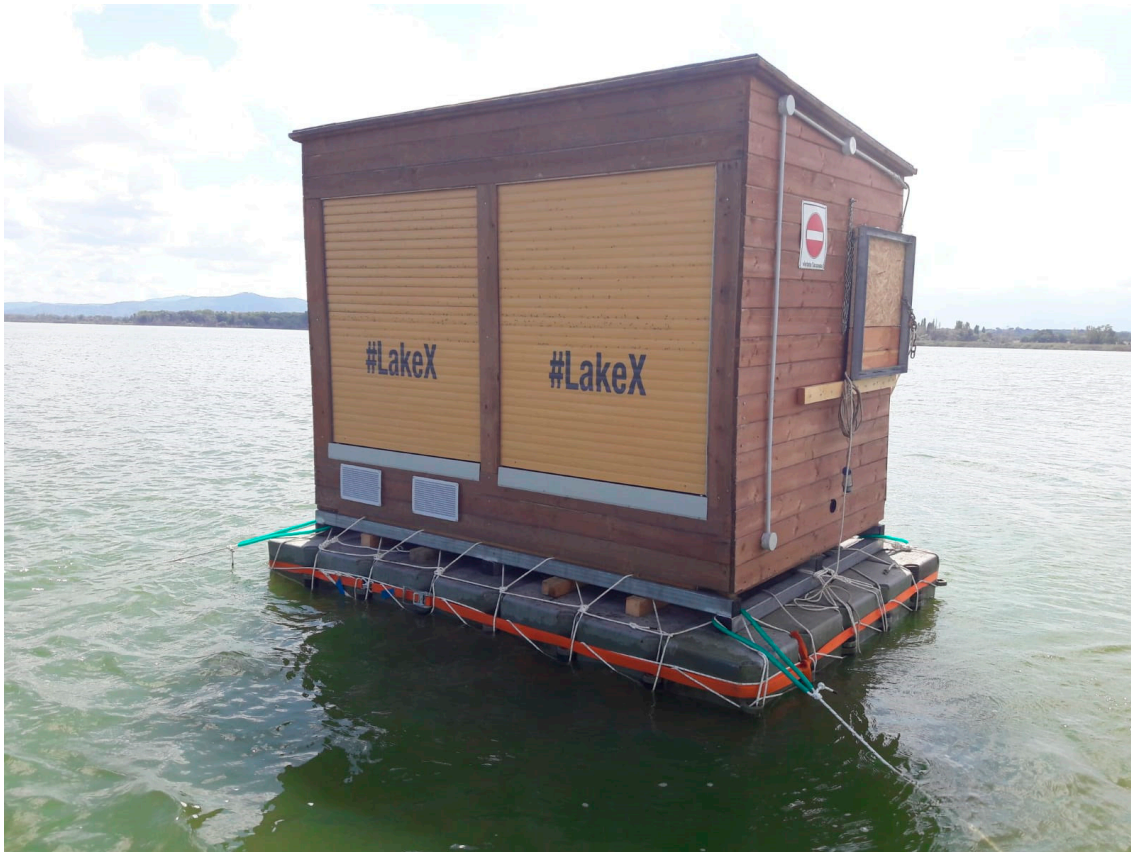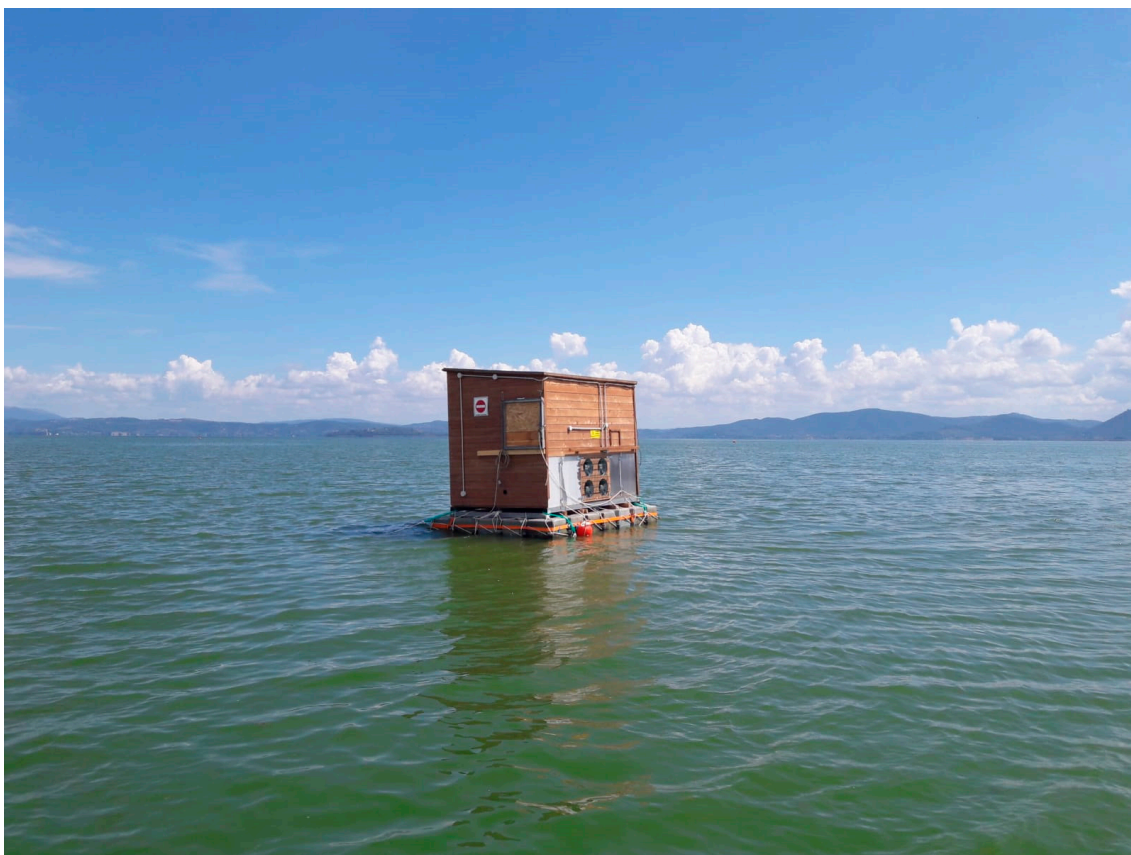

**Figure S4.** ChiroBoat - <http://www.lakex.eu/>.
